## New JCS Editor

We are delighted to announce the appointment of Kathleen Green as an Editor of *Journal of Cell Science*. Currently Joseph L. Mayberry Professor of Pathology and Toxicology at Northwestern University Medical School, Kathy is a leading figure in the field of cell adhesion. Her research career started at Washington University in St Louis, where she obtained a PhD in Cell and Developmental Biology in 1982. Kathy then moved to the Department of Cell Biology at Northwestern to pursue post-doctoral research on intermediate filaments. She subsequently joined the Departments of Pathology and Dermatology, where for several years a major focus of her research has been the structure and functions of desmosomes. Indeed, her work has been instrumental in illuminating the biology of plakins, a family of modular proteins that link cytoskeletal networks with adhesive junctions such as desmosomes and hemidesmosomes.

Kathy has been a regular contributor to and reviewer for JCS for many years and joined the Editorial Board of the journal in 1992. On behalf of all the Editors and staff at JCS, we welcome Kathy to the editorial team and look forward to working with her.

**Fiona M. Watt (Editor-in-Chief) and  
Richard Sever (Executive Editor)**
